# Supplementary material for: Supramolecular Self-Assembly of Atomically Precise Silver Nanoclusters with Chiral Peptide for Temperature Sensing and Detection of Arginine
Source: MDPI journal article supplement (doi:10.3390/nano12030424), 2022-01-27
Supplement: s1 [file s1]

## **Supporting Information**

# **Supramolecular Self-assembly of Atomically Precise Silver Nanoclusters with Chiral Peptide for Temperature Sensing and Detection of Arginine**

Wenjuan Wang, Zhi Wang, Di Sun, Shulin Li, Quanhua Deng, Xia Xin\*

*National Engineering Research Center for Colloidal Materials, Key Laboratory of Colloid and Interface Chemistry (Ministry of Education), School of Chemistry and Chemical Engineering, Shandong University Jinan, 250100, China*

---

\* Author to whom correspondence should be addressed, E-mail: [xinx@sdu.edu.cn](mailto:xinx@sdu.edu.cn)

Phone: +86-531-88363597.

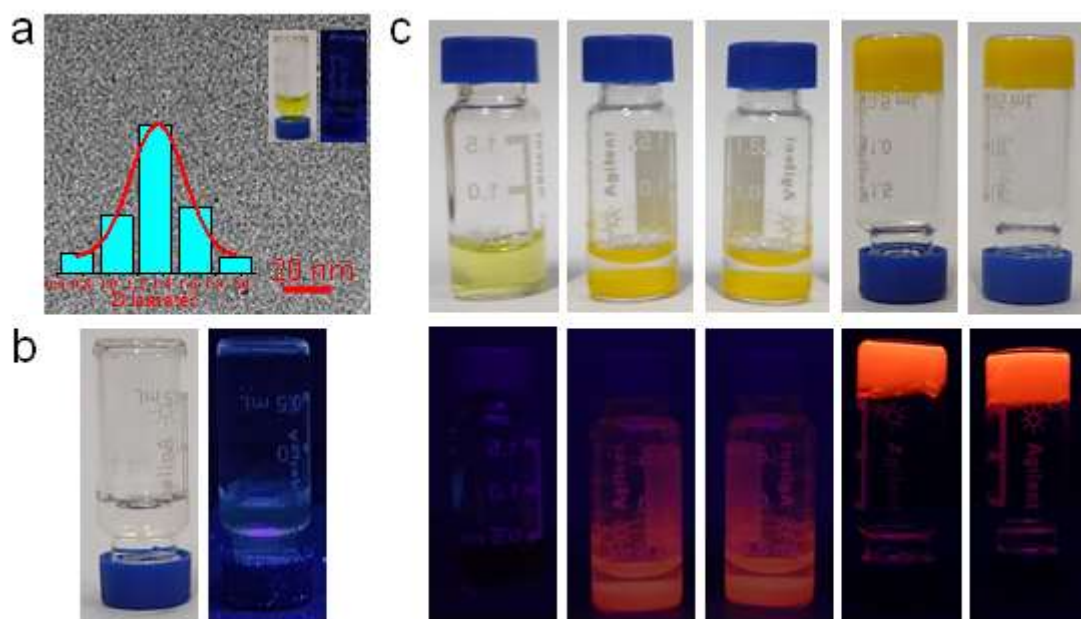

**Figure S1.** Co-assembled primitive photos and co-assembled phase behavior photos. (a) HR-TEM image of 5 mM Ag<sub>9</sub>-NCs in aqueous solution, inset: the results of particle size distribution of Ag<sub>9</sub>-NCs and photographs taken under daylight (left) and 365 nm UV light (right); (b) DD-5 photographs taken under daylight (left) and 365 nm UV light (right); (c) Phase behavior and photographs taken under daylight (up) and 365 nm UV light (down) of Ag<sub>9</sub>-NCs at different DD-5 concentrations. (From left to right: 39 mM, 42 mM, 43 mM, 60 mM, 70 mM).

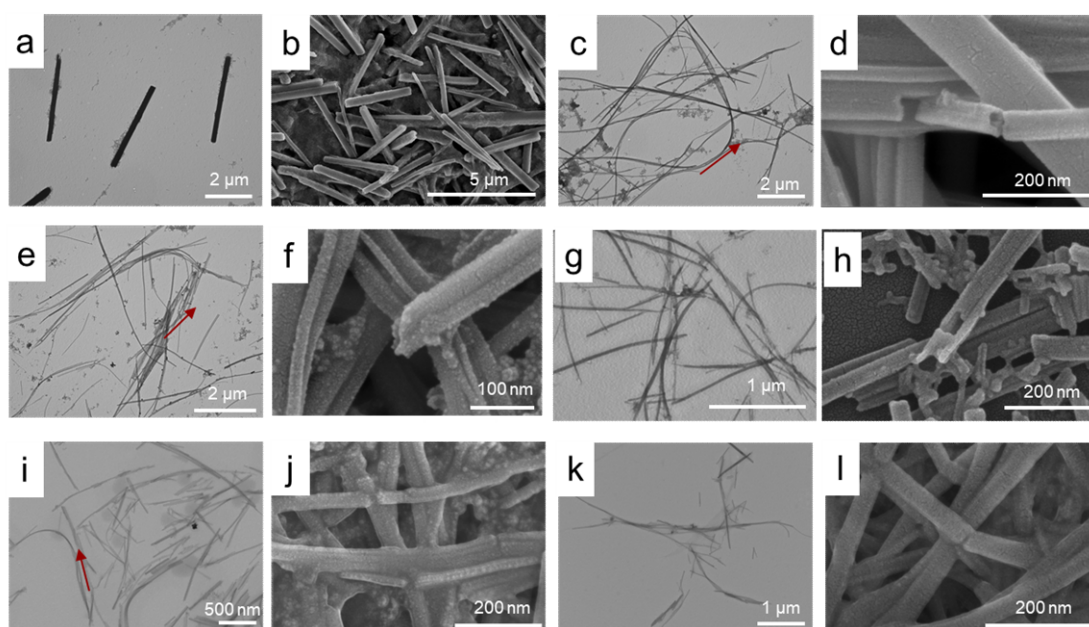

**Figure S2.** TEM and SEM images at different concentrations of DD-5. (a, b) 5 mM Ag<sub>9</sub>-NCs/40 mM DD-5; (c, d) 5 mM Ag<sub>9</sub>-NCs/50 mM DD-5; (e, f) 5 mM Ag<sub>9</sub>-NCs/60 mM DD-5; (g, h) 5 mM Ag<sub>9</sub>-NCs/70 mM DD-5; (i, j) 5 mM Ag<sub>9</sub>-NCs/80 mM DD-5; (k, l) 5 mM Ag<sub>9</sub>-NCs/90 mM DD-5.

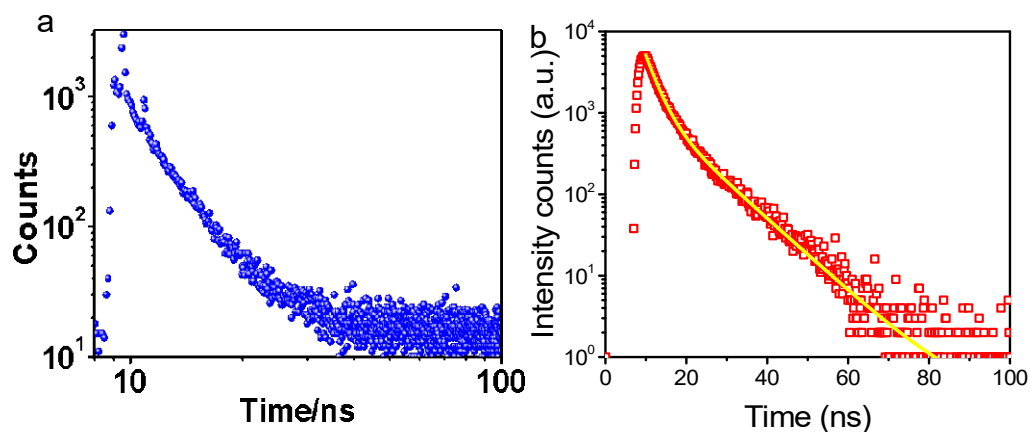

**Figure S3.** PL decay curve of lyophilized  $\text{Ag}_9\text{-NCs}$  solution and  $\text{Ag}_9\text{-NCs/DD-5}$  hydrogel. (a) lyophilized  $\text{Ag}_9\text{-NCs}$  solution; (b)  $\text{Ag}_9\text{-NCs/DD-5}$  hydrogel.

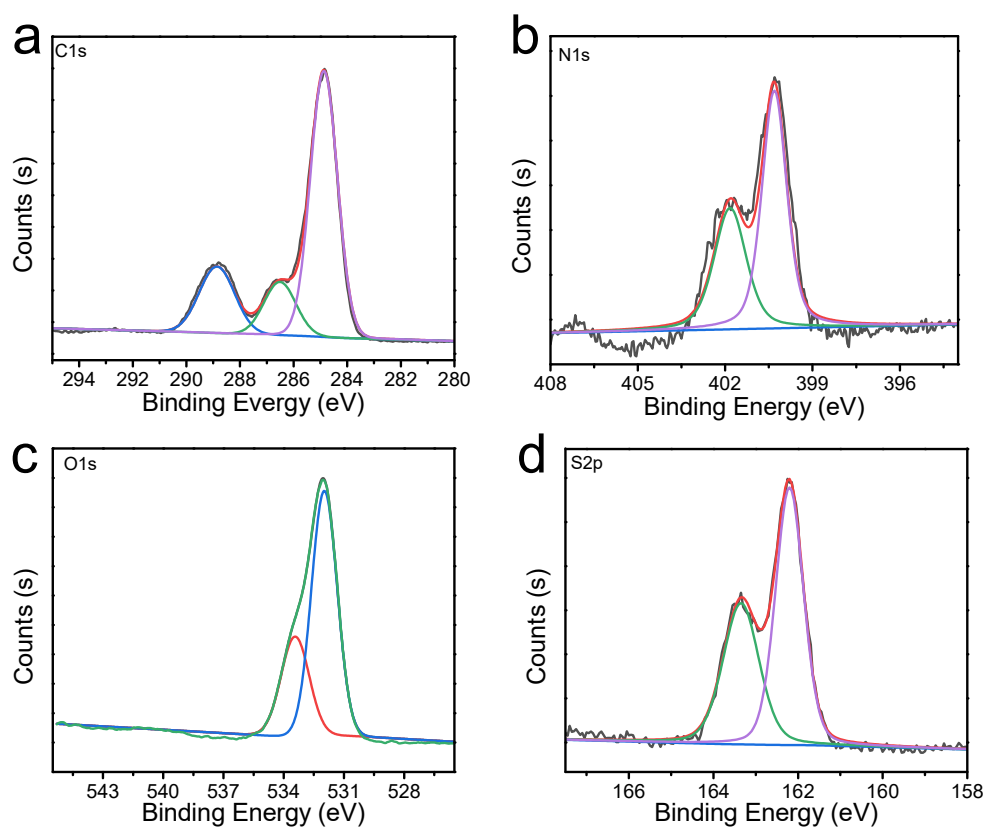

**Figure S4.** High-resolution XPS spectra of the  $\text{Ag}_9\text{-NCs/DD-5}$  xerogel. (a)  $\text{C}_{1s}$ ; (b)  $\text{N}_{1s}$ ; (c)  $\text{O}_{1s}$  and (d)  $\text{S}_{2p}$ .

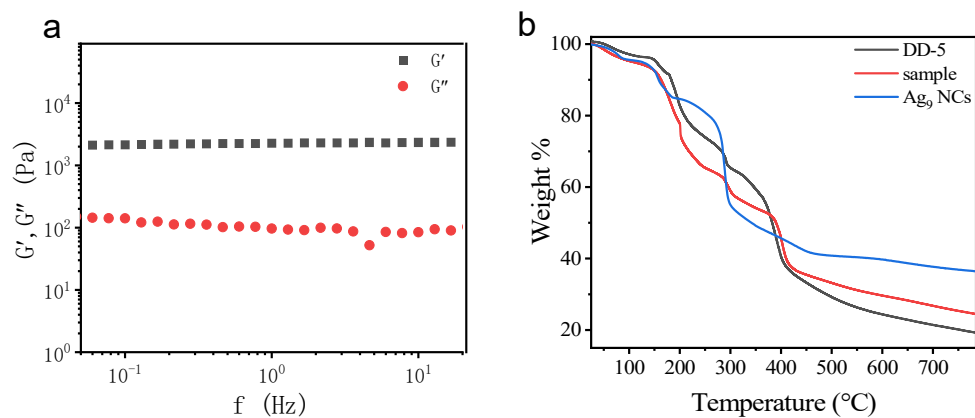

**Figure S5.** Hydrogel rheology and xerogel TGA. **(a)** frequency tests at  $\tau = 10$  Pa for the Ag<sub>9</sub>-NCs/DD-5 hydrogel; **(b)** TGA of a lyophilized Ag<sub>9</sub>-NCs solution, DD-5 and Ag<sub>9</sub>-NCs/DD-5 xerogel.

**Table S1.** Lifetime of the powder of lyophilized Ag<sub>9</sub>-NCs solution.

| Sample/Lifetime      | $\tau_2$ / ns | $\tau_2$ / ns | $\tau_{ave}$ / ns |
|----------------------|---------------|---------------|-------------------|
| Ag <sub>9</sub> -NCs | 0.032 (13.1%) | 1.973 (50.7%) | 3.277             |

**Table S2.** Lifetime of Ag<sub>9</sub>-NCs/DD-5 hydrogel.

| Sample/Lifetime | $\tau_2$ / ns   | $\tau_2$ / ns   | $\tau_{ave}$ / ns |
|-----------------|-----------------|-----------------|-------------------|
| hydrogel        | 2.7584 (51.89%) | 9.7149 (48.11%) | 6.105             |
